# Rolling blackout is required for bulk endocytosis in non-neuronal cells and neuronal synapses

Niranjana Vijayakrishnan, Elvin A. Woodruff III and Kendal Broadie

*Journal of Cell Science* 122, 745 (2009) doi:10.1242/jcs.050047

There was an error published in *J. Cell Sci.* 122, 114-125.

In the left-hand panel of Fig. 7C (left), the control condition at 37°C was mistakenly shown with an example at 25°C. This error is corrected below with a new Fig. 7C (left) showing the control 37°C condition. The figure legend, results and interpretation for this work have not been altered in any way.

The corresponding author apologizes for this error.

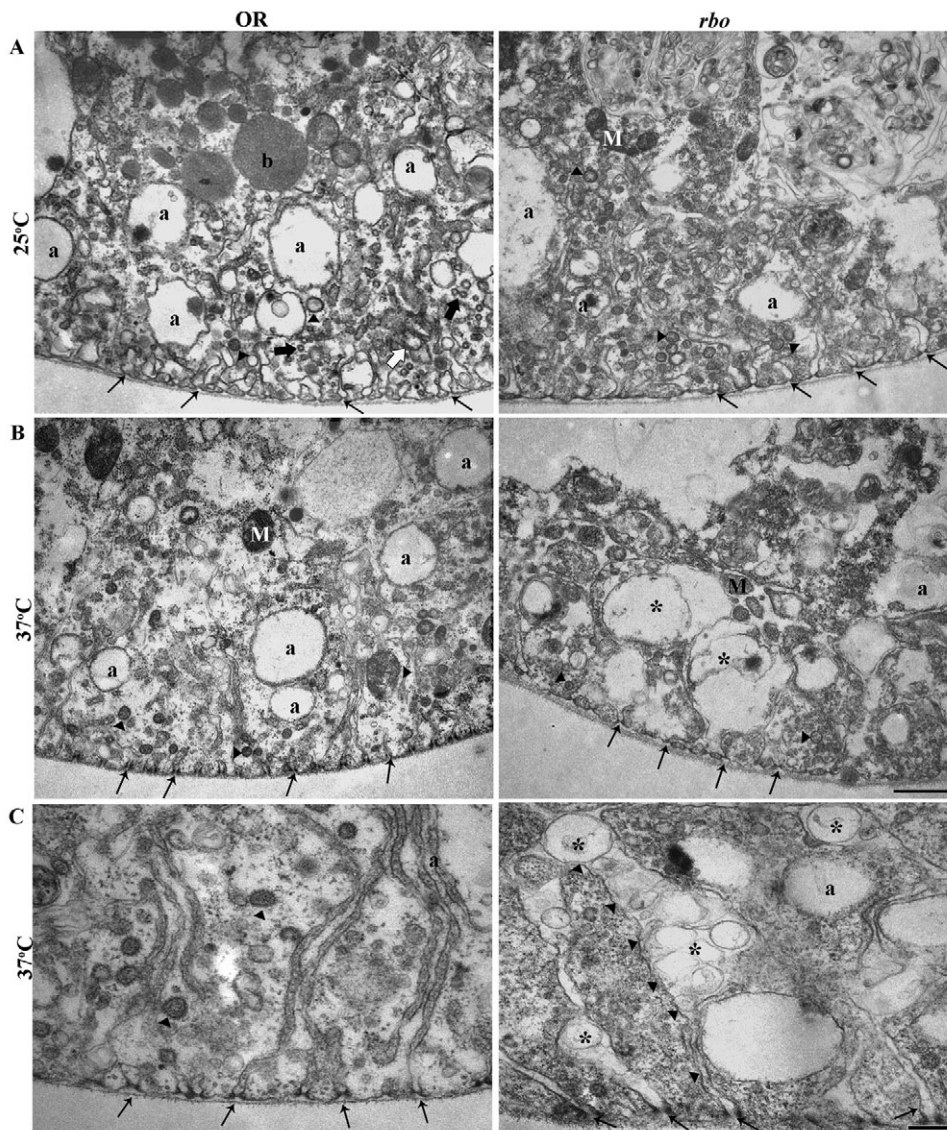

Source: https://cob.silverchair.com/jcs/article-pdf/122/5/745/1375715/745.pdf
